# Supplementary material for: 6-year follow-up of 84 patients with cartilage defects in the knee: Knee scores improved but recovery was incomplete
Source: PubMed Central journal article supplement (PMC3214752; doi:10.3109/17453674.2010.519166), 2010-10-08
Supplement: ORT-1745-3674-81-611-s3813.pdf [file ORT-1745-3674-81-611-s3813.pdf]

## Supplementary article data

# 6-year follow-up of 84 patients with cartilage defects in the knee

## Knee scores improved but recovery was incomplete

Sverre Løken<sup>1,3</sup>, Stig Heir<sup>2,3</sup>, Ingar Holme<sup>3</sup>, Lars Engebretsen<sup>1,3</sup>, and Asbjørn Årøen<sup>1,3</sup>

<sup>1</sup>Orthopaedic Department, Oslo University Hospital; <sup>2</sup>Martina Hansens Hospital; <sup>3</sup>Oslo Sports Trauma Research Center, Oslo, Norway  
Correspondence SL: s-loek@online.no  
Submitted 09-11-11. Accepted 10-03-26

Table 4. Various tests conducted at follow up to assess knee function. Patients were grouped based on the types of procedures performed

| Cartilage repair: <sup>a</sup><br>Ligament/meniscus surgery: | Subgroup 1                     | Subgroup 2                            | Subgroup 3                            | Subgroup 4                             | All patients<br>(n = 84/98) <sup>b</sup><br>Mean (SD) |
|--------------------------------------------------------------|--------------------------------|---------------------------------------|---------------------------------------|----------------------------------------|-------------------------------------------------------|
|                                                              | No<br>(n = 19/25)<br>Mean (SD) | No<br>Yes<br>(n = 35/39)<br>Mean (SD) | Yes<br>No<br>(n = 18/21)<br>Mean (SD) | Yes<br>Yes<br>(n = 12/13)<br>Mean (SD) |                                                       |
| Lysholm                                                      | 71 (23)                        | 83 (16)                               | 75 (24)                               | 67 (24)                                | 76 (21)                                               |
| Tegner <sup>c</sup>                                          | 3.7 (2.2)                      | 4.9 (1.6)                             | 4.4 (1.6)                             | 3.8 (2.5)                              | 4.3 (1.9)                                             |
| KOOS Pain                                                    | 72 (22)                        | 82 (19)                               | 80 (21)                               | 72 (29)                                | 78 (22)                                               |
| KOOS Symptoms                                                | 72 (22)                        | 78 (20)                               | 76 (17)                               | 67 (24)                                | 75 (21)                                               |
| KOOS Activities of daily life                                | 83 (20)                        | 89 (17)                               | 87 (16)                               | 79 (26)                                | 86 (19)                                               |
| KOOS Sport and recreation                                    | 55 (34)                        | 68 (28)                               | 63 (33)                               | 48 (39)                                | 61 (33)                                               |
| KOOS Knee-related quality of life                            | 55 (27)                        | 64 (27)                               | 64 (24)                               | 54 (28)                                | 61 (26)                                               |
| IKDC                                                         | 60 (24)                        | 70 (21)                               | 69 (24)                               | 59 (29)                                | 66 (23)                                               |
| Cincinnati                                                   | 67 (27)                        | 76 (17)                               | 71 (25)                               | 62 (28)                                | 71 (23)                                               |
| SF36 Physical Function                                       | 71 (22)                        | 83 (17)                               | 80 (23)                               | 70 (28)                                | 78 (22)                                               |
| SF36 Role Physical                                           | 75 (25)                        | 86 (22)                               | 92 (14)                               | 73 (32)                                | 83 (24)                                               |
| SF36 Bodily Pain                                             | 62 (24)                        | 78 (24)                               | 73 (26)                               | 65 (33)                                | 71 (26)                                               |
| SF36 General Health                                          | 72 (20)                        | 81 (19)                               | 75 (21)                               | 77 (24)                                | 77 (20)                                               |
| SF36 Vitality                                                | 58 (20)                        | 71 (18)                               | 66 (22)                               | 61 (24)                                | 65 (21)                                               |
| SF36 Social Function                                         | 88 (14)                        | 91 (15)                               | 93 (15)                               | 84 (23)                                | 90 (16)                                               |
| SF36 Role Emotional                                          | 94 (12)                        | 93 (14)                               | 97 (6)                                | 91 (17)                                | 94 (13)                                               |
| SF36 Mental Health                                           | 86 (10)                        | 84 (12)                               | 87 (7)                                | 83 (15)                                | 85 (11)                                               |
| Single leg jump: <sup>d</sup>                                |                                |                                       |                                       |                                        |                                                       |
| 1. > 90 %                                                    | 9                              | 15                                    | 6                                     | 5                                      | 35                                                    |
| 2. 76–90%                                                    | 1                              | 7                                     | 3                                     | 2                                      | 13                                                    |
| 3. 50–75%                                                    | 1                              | 4                                     | 1                                     | 1                                      | 7                                                     |
| 4. < 50%                                                     | 0                              | 3                                     | 0                                     | 1                                      | 4                                                     |

<sup>a</sup> Cartilage repair was defined as: an autologous chondrocyte implantation (with a preceding biopsy), an osteochondral cylinder transfer, microfracture, or fixation of osteochondral fragment.

<sup>b</sup> Refers to the number of patients who attended follow up in relation to the number of patients at baseline.

<sup>c</sup> Tegner activity score: Categorical variable 1-10 (10= highest level).

<sup>d</sup> Single leg jump: Categorical variable 1–4 (average one-leg jump distance with affected knee/distance with contra-lateral knee = 100%). All other scores are numeric variables 0–100 (100 = best score).

Abbreviations: KOOS= Knee injury and Osteoarthritis Outcome Score; ADL= activities of daily life; QOL=quality of life; IKDC= International Knee Documentation Committee's Subjective Knee Form; Cincinnati= Cincinnati Knee Rating System; SF36= Short Form 36 Health Survey.

Table 5. Linear regression analysis shown for the main outcome variable: "Change in ICRS functional score". First a univariate regression was made for the following possible predictors at baseline: area of the cartilage lesion, location of the cartilage lesion, additional ligament or meniscus surgery and cartilage surgery. Then a multivariate analysis was made for these 4 variables combined. Finally, a second multivariate analysis was made adjusting for age at the start of symptoms, age at baseline, sex and BMI

|                               | Univariate |        |         |                | Multivariate (first 4 variables) |        |         |                | Multivariate (all variables) |        |         |                |       |     |       |
|-------------------------------|------------|--------|---------|----------------|----------------------------------|--------|---------|----------------|------------------------------|--------|---------|----------------|-------|-----|-------|
|                               | B          | 95% CI | p-value | R <sup>2</sup> | B                                | 95% CI | p-value | R <sup>2</sup> | B                            | 95% CI | p-value | R <sup>2</sup> |       |     |       |
| Possible predictors:          |            |        |         |                |                                  |        |         |                |                              |        |         |                |       |     |       |
| Area of cartilage lesion      | -0.038     | -0.27  | 0.20    | 0.7            | 0.001                            | -0.075 | -0.33   | -0.18          | 0.6                          | 0.015  | -0.052  | -0.34          | 0.24  | 0.7 | 0.017 |
| Location of cartilage lesion  | -0.026     | -0.16  | 0.11    | 0.7            | 0.002                            | -0.011 | -0.15   | 0.13           | 0.9                          |        | 0.016   | -0.14          | 0.17  | 0.8 |       |
| Ligament or meniscus surgery  | -0.014     | -0.50  | 0.47    | 1.0            | <0.001                           | 0.012  | -0.50   | 0.52           | 1.0                          |        | -0.012  | -3.24          | -3.24 | 1.0 |       |
| Cartilage repair              | 0.205      | -0.29  | 0.71    | 0.4            | 0.009                            | 0.256  | -0.30   | 0.82           | 0.4                          |        | 0.204   | -0.34          | 0.24  | 0.5 |       |
| Possible confounding factors: |            |        |         |                |                                  |        |         |                |                              |        |         |                |       |     |       |
| Age at the start of symptoms  |            |        |         |                |                                  |        |         |                |                              |        | -0.007  | -0.14          | 0.17  | 0.7 |       |
| Age at baseline               |            |        |         |                |                                  |        |         |                |                              |        | 0.008   | -0.61          | 0.58  | 0.7 |       |
| Sex                           |            |        |         |                |                                  |        |         |                |                              |        | -0.169  | -0.40          | 0.81  | 0.6 |       |
| Body Mass Index               |            |        |         |                |                                  |        |         |                |                              |        | 0.018   | -0.05          | 0.04  | 0.6 |       |
